# Supplementary material
Source: Springer Nature journal article supplement (https://www.springermedizin.de/resource/supplementary/12888_2008_514_MOESM8_ESM.pdf/9483474)

Alcohol Dependence (12 months prevalence) in men and women

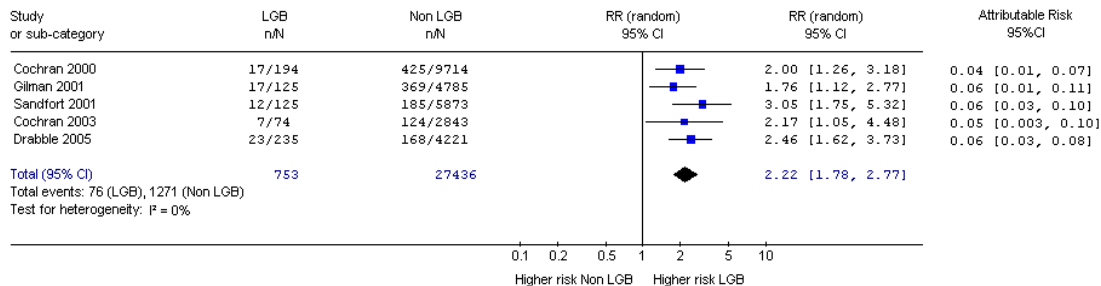

Alcohol Dependence (12 months prevalence) in men only

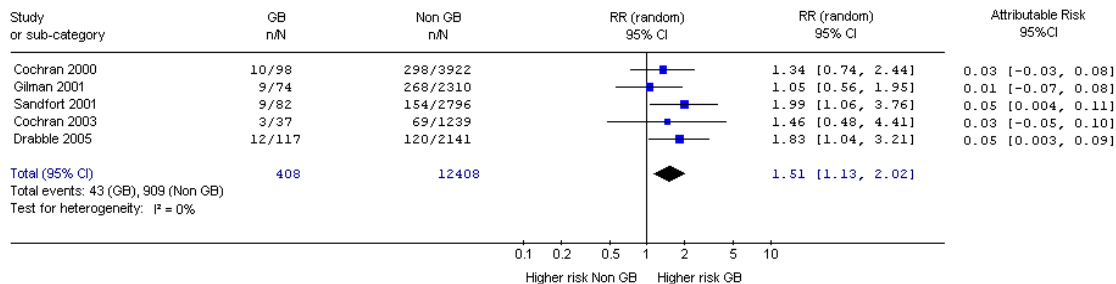

Alcohol Dependence (12 months prevalence) in women only

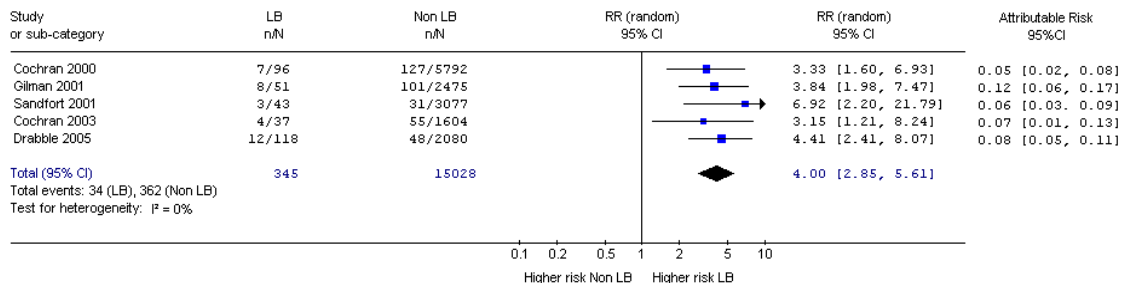

Supplement: MOESM8 [file 9483474]
